# Imprinted expression of *UBE3A* in non-neuronal cells from a Prader–Willi syndrome patient with an atypical deletion

Kristen Martins-Taylor<sup>1,†</sup>, Jack S. Hsiao<sup>1,†</sup>, Pin-Fang Chen<sup>1</sup>, Heather Glatt-Deeley<sup>1</sup>, Adam J. De Smith<sup>2,‡</sup>, Alexandra I.F. Blakemore<sup>2</sup>, Marc Lalonde<sup>1,\*</sup> and Stormy J. Chamberlain<sup>1,\*</sup>

<sup>1</sup>Department of Genetics and Developmental Biology, University of Connecticut Health Center, Farmington, CT, USA and  
<sup>2</sup>Department of Medicine, Imperial College London, Hammersmith Hospital Campus, Du Cane Road, London, UK

Received October 4, 2013; Revised November 21, 2013; Accepted December 9, 2013

**Prader–Willi syndrome (PWS) and Angelman syndrome (AS) are two neurodevelopmental disorders most often caused by deletions of the same region of paternally inherited and maternally inherited human chromosome 15q, respectively. AS is a single gene disorder, caused by the loss of function of the ubiquitin ligase *E3A (UBE3A)* gene, while PWS is still considered a contiguous gene disorder. Rare individuals with PWS who carry atypical microdeletions on chromosome 15q have narrowed the critical region for this disorder to a 108 kb region that includes the *SNORD116* snoRNA cluster and the *Imprinted in Prader–Willi (IPW)* non-coding RNA. Here we report the derivation of induced pluripotent stem cells (iPSCs) from a PWS patient with an atypical microdeletion that spans the PWS critical region. We show that these iPSCs express brain-specific portions of the transcripts driven by the PWS imprinting center, including the *UBE3A antisense transcript (UBE3A-ATS)*. Furthermore, *UBE3A* expression is imprinted in most of these iPSCs. These data suggest that *UBE3A* imprinting in neurons only requires *UBE3A-ATS* expression, and no other neuron-specific factors. These data also suggest that a boundary element lying within the PWS critical region prevents *UBE3A-ATS* expression in non-neural tissues.**

## INTRODUCTION

Angelman syndrome (AS) and Prader–Willi syndrome (PWS) are neurodevelopmental disorders that are most commonly caused by large deletions of human chromosome 15q11–q13 (1). Individuals with AS suffer from cognitive impairment, absent speech, seizures, ataxic gait and a happy demeanor, while individuals with PWS initially present with hypotonia and failure-to-thrive (2). PWS individuals then go through a phase of normal growth before progressing to a period of above-normal weight gain, and finally, a period of intense food seeking behavior and hyperphagia (3). PWS leads to morbid obesity without diet, exercise and often growth hormone intervention. Individuals with PWS also suffer mild cognitive impairment, short stature and behavioral issues including obsessive-compulsive disorder (4). While the two disorders are very different from one another, they can result from exactly the same deletion, but the deletion

differs in its parent-of-origin. AS is caused by deletions of maternal chromosome 15q11–q13 and PWS is caused by the same deletion that occurs on the paternally inherited allele (1).

The parent-of-origin specific effects of chromosome 15q11–q13 deletions occur due to the regulation of the locus by genomic imprinting. A map of this region is shown in Figure 1. The imprinting control region is a differentially methylated region encompassing the promoter and first exon of *SNURF-SNRPN* (5,6). It is methylated on the paternal allele and unmethylated on the maternal allele. Several genes are expressed exclusively from the paternally inherited allele, including *MKRN3* (7), *MAGEL2* (8), *NDN* (9), *NPAP1* (10), *SNURF-SNRPN* (11,12), *SNORD107* (13), *SNORD64* (14), *SNORD108* (13), *SNORD109A* (13), *SNORD116* (14), *IPW* (15), *SNORD115* (14), *SNORD109B* (13) and *UBE3A-ATS* (16). Several paternally expressed genes, including the *SNORD* genes, *IPW* and *UBE3A-ATS* are non-coding RNAs (ncRNAs) driven from

\*To whom correspondence should be addressed. Email: chamberlain@uchc.edu (S.J.C.) or lalonde@uchc.edu (M.L.)

<sup>†</sup>Equal contributors.

<sup>‡</sup>Present address: Department of Epidemiology and Biostatistics, UCSF School of Medicine, San Francisco, CA, USA.

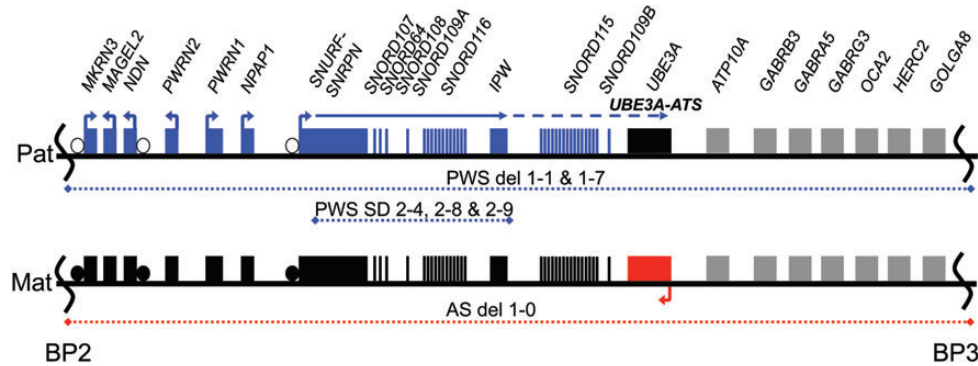

**Figure 1.** Map of chromosome 15q11–q13 region. Map of chromosome 15q11–q13 between common break points 2 and 3 (BP2 and BP3). Blue dotted lines represent the regions deleted on the paternal allele and red dotted line represents the regions deleted on the maternal allele for the indicated cell lines. Blue and red boxes denote genes expressed exclusively from paternal and maternal alleles, respectively. Gray boxes denote genes expressed biallelically. Differential methylated regions (DMRs) are shown using circles where open and closed circles represent unmethylated and methylated alleles, respectively. Arrows indicate the direction of transcription. A solid blue line represents paternal *SNURF/SNRPN* transcripts expressed in most cell types, whereas a dashed blue line indicates neuron-specific transcripts, including *UBE3A-ATS*.

the *SNURF-SNRPN* promoter (13). In humans, *SNORD107*, *SNORD64*, *SNORD108*, *SNORD109A*, *SNORD116* and *IPW* are expressed broadly across several tissues, but *SNORD115*, *SNORD109B* and *UBE3A-ATS* are expressed exclusively in neurons, concomitant with the use of upstream exons of the *SNURF-SNRPN* gene (17). Only one imprinted gene is expressed exclusively from the maternally inherited allele: *UBE3A* (18). This gene is expressed from both parental alleles in most tissues, but is expressed exclusively from the maternally inherited allele in neurons. The tissue-specific imprinted expression of *UBE3A* occurs due to the tissue-specific expression of *UBE3A-ATS* from the paternal allele (16,17,19). Mutations of *UBE3A* are sufficient to cause AS (20).

Recently, several individuals with PWS caused by rare, atypical smaller deletions have been reported in the literature (21–23). Together these individuals have delineated a smallest region of deletion overlap that underlies the PWS phenotype. This smallest region of deletion overlap includes the *SNORD116* cluster along with other singleton snoRNAs and the ncRNA, *IPW*. Interestingly, lymphoblastoid lines from two of these individuals were shown to express either *SNORD115* or *SNORD109B*, transcripts that are usually restricted to neurons (21,22). We sought to determine whether non-neural cells from one of these individuals expressed the neuron-specific *UBE3A-ATS* and showed imprinted *UBE3A* expression. Here we report the derivation and characterization of induced pluripotent stem cells from an individual with a small atypical deletion spanning the *SNORD116* cluster and *IPW* ncRNAs. We demonstrate that induced pluripotent stem cells (iPSCs) from this individual express *UBE3A-ATS* and show imprinted *UBE3A* expression, phenomena that are usually restricted to neurons. We show that this occurs without the expression of the neuron-specific upstream exons of *SNURF-SNRPN*, and results in a shortened *SNURF-SNRPN/UBE3A-ATS* ncRNA that is resistant to silencing by the topoisomerase inhibitor, Topotecan. These data suggest that the expression of *UBE3A-ATS* is sufficient for imprinted *UBE3A* expression and that a boundary element lying within the smallest region of deletion overlap for the PWS phenotype prevents the expression of *UBE3A-ATS* in non-neural tissues.

## RESULTS

### Derivation of iPSCs from PWS small deletion patient

We obtained PWS patient fibroblasts with a 187 kb microdeletion of paternal 15q11–q13 (21), and reprogrammed them into iPSCs using the human polycistronic STEMCCA lentiviral vector encoding *OCT4*, *KLF4*, *SOX2* and *CMYC* (24). The boundaries of this deletion are diagrammed in Figure 1. Reprogrammed colonies were initially identified morphologically and were subsequently validated using immunocytochemistry to verify the expression of the pluripotency markers NANOG, SSEA-4, TRA1-60 and TRA1-81 by immunocytochemistry (Fig. 2A). PWS SD iPSCs had normal karyotypes of 46 XY (Supplementary Material, Fig. S1), because the microdeletion cannot be detected by G-banded karyotyping. We confirmed the deletion by quantitative RT–PCR for gene expression analysis in PWS SD iPSCs for genes within the microdeletion, as described in de Smith *et al.* (21). Expression of *SNORD116* and *IPW* was undetectable in the PWS SD iPSCs, compared with the normal iPSC line NML 1-0, while genes located outside of the deleted region (*NDN*, *ATP10A* and *GABRB3*) were expressed in PWS SD iPSCs (Fig. 2B). iPSC lines derived from a PWS patient harboring a large deletion of paternal 15q11–q13 (PWS del 1-7), as well as from an AS patient with a large deletion of maternal 15q11–q13 (AS del 1-0), were used as controls (17). The boundaries of these deletions are also shown in Figure 1. PWS del 1-7 iPSCs did not express the paternally expressed genes *NDN*, *SNORD116* and *IPW* as expected, but expressed *ATP10A* and *GABRB3*, while AS del 1-0 iPSCs expressed *SNORD116* and *IPW*, as well as *NDN*, *ATP10A* and *GABRB3* (Fig. 2B). To determine whether the differential methylation that marks the PWS-IC was maintained during reprogramming, the methylation imprint of the PWS-IC was assessed in PWS SD fibroblasts and iPSCs by methylation-sensitive restriction endonuclease quantitative PCR. Only an unmethylated paternal allele was observed in AS del 1-0 iPSCs, while only a methylated maternal allele was observed in PWS del 1-7 iPSCs, as previously described (17). Both a methylated maternal allele and an unmethylated paternal allele were present in all of the PWS

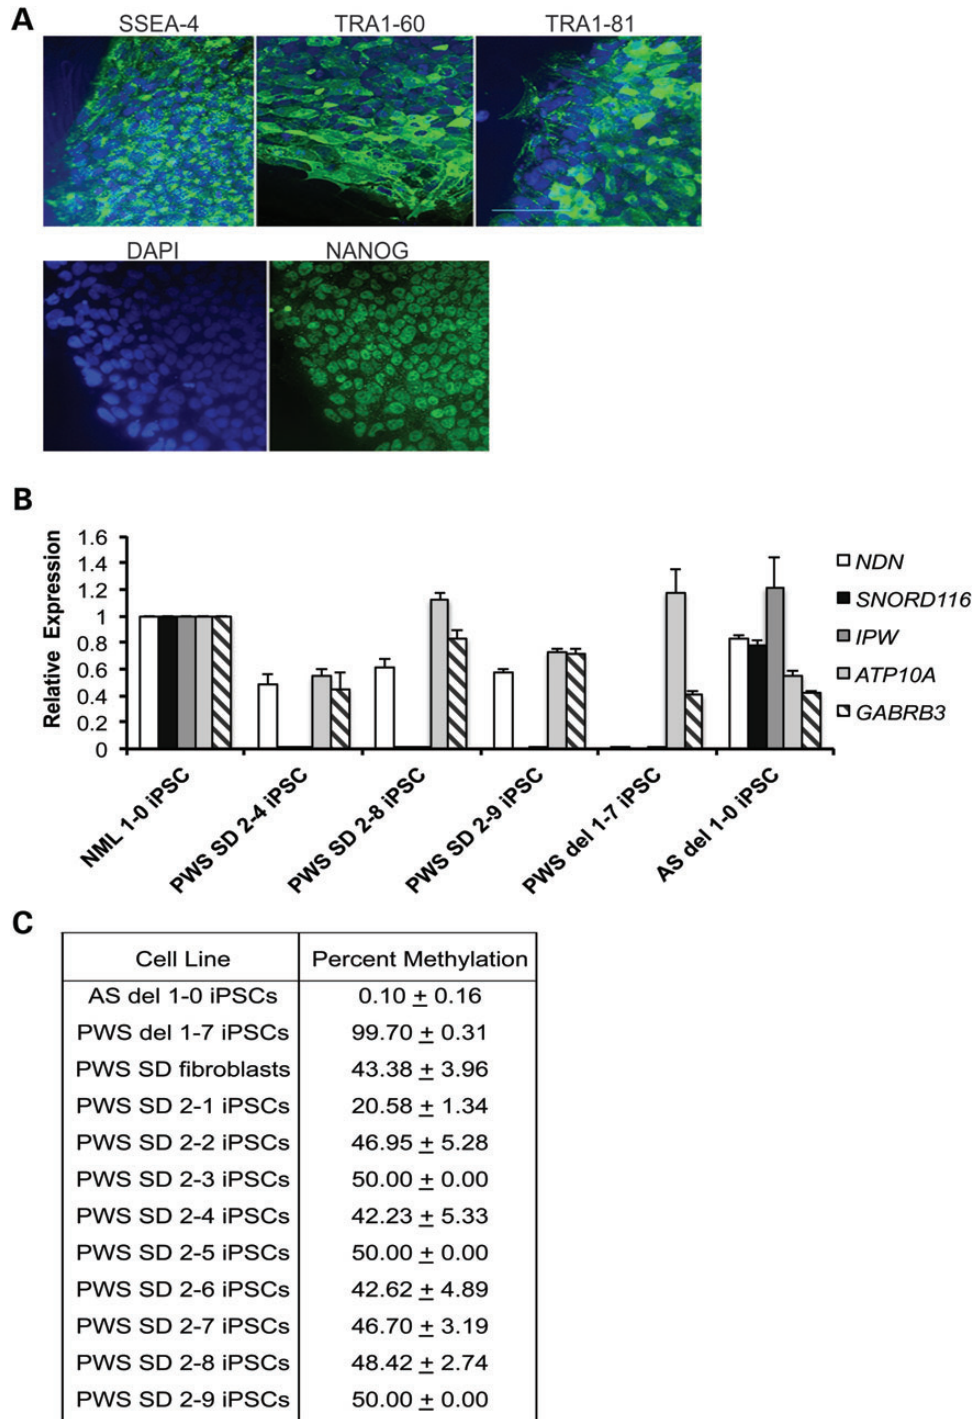

**Figure 2.** Characterization of PWS SD iPSC lines. (A) Immunocytochemistry for the pluripotency markers NANOG, SSEA-4, TRA1-80 and TRA1-81. Cell nuclei were counterstained with DAPI. Scale bar = 100 μm. (B) Expression of genes within 15q11–q13 region iPSCs to confirm deletion in PWS SD iPSCs. *GAPDH* was used as an endogenous control, and data were normalized to NML 1-0 iPSCs. (C) Methylation analysis of PWS-IC within *SNPRN*, using a methylation-sensitive restriction endonuclease quantitative PCR assay, confirming the maintenance of genomic imprinting at the PWS-IC following reprogramming in PWS SD iPSCs. PWS del 1-7 and AS del 1-0 iPSCs were used as controls. Percent methylation was reported plus or minus the SD of three replicates.

SD fibroblasts and iPSC lines (Fig. 2C), with percent methylation ranging from 42 to 50% in most iPSC lines. The PWS SD 2-1 iPSC line appeared to have aberrant methylation of the PWS-IC, and was excluded from further study. The remaining PWS SD iPSC lines had methylation levels approximately

equal to the PWS SD fibroblast line. To confirm that the PWS SD iPSC lines were capable of multi-lineage differentiation, the cells were differentiated into embryoid bodies (EBs). After 16 days of spontaneous differentiation, the EBs were collected and analyzed by qRT-PCR for lineage markers for all three

germ layers, using a custom-designed TaqMan<sup>®</sup> scorecard that incorporated lineage markers described in Bock *et al.* (25). AS del 1-0, PWS del 1-7 and NML 1-0 iPSCs were used as positive controls in these assays. Early lineage markers representing each of the three embryonic germ layers were expressed in the EBs derived from each of the PWS SD iPSCs (Supplementary Material, Fig. S2), demonstrating that they are capable of multi-lineage differentiation.

### Paternal *UBE3A* is imprinted in non-neuronal cells

Two recent studies reported the expression of either *SNORD115* or *SNORD109B*, transcripts that are normally restricted to neurons, in PWS SD patient lymphocytes (21,22). To determine whether the neuron-specific gene was also expressed in PWS SD iPSCs, we performed qRT-PCR for *SNORD115*. In agreement with the expression data from lymphocytes, robust expression of *SNORD115* was observed in PWS SD iPSCs (Fig. 3A). We then performed conventional RT-PCR for *UBE3A-ATS* to determine whether this transcript extended into the *UBE3A* gene. Strong expression of *UBE3A-ATS* was observed using primers anchored in exons exclusive to *UBE3A-ATS* (Fig. 3B). Since *UBE3A-ATS* was expressed, we hypothesized that *UBE3A* expression would be imprinted; the expression of paternal *UBE3A-ATS* in neurons should repress-paternal *UBE3A* expression (16,17,19). We first tested this hypothesis using qRT-PCR to determine *UBE3A* mRNA levels in PWS SD iPSCs. Normal iPSCs have twice as much *UBE3A* mRNA, when compared with AS and PWS iPSCs with large deletions of chromosome 15q11-q13 (Fig. 3C). This most likely occurs because *UBE3A* expression is bi-allelic in iPSCs. Normal iPSCs have two copies of *UBE3A*, while AS and PWS iPSCs harbor a large deletion of chromosome 15q11-q13 with only a single copy of *UBE3A*. Although PWS SD iPSCs have two intact copies of *UBE3A*, its relative expression is half of the normal iPSCs and similar to both AS and PWS iPSCs, where there is only one copy of *UBE3A* (Fig. 3C). This suggests that *UBE3A* may be imprinted in the PWS SD iPSCs.

In order to determine whether one copy of *UBE3A* is repressed, we performed allele-specific RT-PCR analysis of *UBE3A* expression. We first screened most of the *UBE3A* cDNA to identify allele-specific polymorphisms. Upon finding no polymorphisms in the cDNA, we then scanned the introns in the hopes that a polymorphism in the pre-mRNA could be used to determine allele-specific expression. We identified a polymorphism in intron 9 of *UBE3A* where one allele has 5 copies of a 26 nucleotide repeat and the other allele has 4 copies of this repeat in PWS SD iPSCs. The normal iPSC line is also polymorphic at this site, with different numbers of repeats. We performed semi-quantitative strand-specific RT-PCR using primers flanking this polymorphism to determine the allele-specific expression of *UBE3A* sense pre-mRNA transcripts. As expected, the *UBE3A* sense is transcribed equally from both alleles in the normal iPSC line. In PWS SD iPSCs, however, most of the *UBE3A* sense transcript comes from only a single allele, presumably due to the aberrant expression of *UBE3A-ATS* from the paternal allele in these iPSCs (Fig. 3D).

To further confirm that the paternally inherited allele of *UBE3A* is silenced and the maternally inherited allele is

expressed in PWS SD iPSCs, we performed RNA FISH using a riboprobe that specifically detects *UBE3A* sense transcripts and a BAC probe that detects *SNORD115* transcripts. In normal iPSCs, *UBE3A* is actively transcribed from both alleles, and *SNORD115* transcripts are not detected, as expected (Fig. 3E, left panel). In PWS SD iPSCs, most of the cells have a single expressed copy of *UBE3A* that does not co-localize with the single expressed copy of *SNORD115*, demonstrating that paternal *UBE3A* is repressed, presumably by the expression of *UBE3A-ATS* (Fig. 3E, middle and right panels). Notably, a small portion of cells (17% ± 2%) still express *UBE3A* from both parental alleles even though they produce *SNORD115*, indicated by the asterisk (Fig. 3E, right panel).

### *SNRPN* upstream exon usage is not affected in PWS SD iPSCs and neurons

In brain, expression of *UBE3A-ATS* and imprinted *UBE3A* expression occur concomitantly with the use of several upstream exons of *SNURF-SNRPN*, diagrammed in Figure 4A. The use of these upstream exons is thought to shift the expression from the protein coding exons of *SNURF-SNRPN* to the non-coding downstream exons (26). In humans, at least one upstream *SNURF-SNRPN* exon is used in many non-neural tissues. Coincidentally, downstream ncRNAs between and *SNURF-SNRPN* and *IPW* (inclusive of *IPW*) are expressed in many tissues, including iPSCs. To determine whether the aberrant expression of *UBE3A-ATS* correlated with the use of the neuron-specific upstream exons of *SNURF-SNRPN*, we differentiated the PWS SD iPSCs into neurons to compare upstream exon usage between neural and non-neural tissue.

In order to choose PWS SD iPSC lines that are capable of efficient differentiation into neurons, we examined the expression levels of genes critical for specification into the neural lineage in d16 EBs (Supplementary Material, Fig. S3A), using the scorecard described above. In addition to the lineage markers used to verify multi-lineage differentiation potential, this card also had probe-primer sets for an abbreviated list of widely used neural lineage marker genes (Supplementary Material, Table S1) (25). Probe-primer sets to the pluripotency genes *NANOG* and *ZFP42/REX1* were also included in the scorecard to determine whether pluripotency genes were appropriately turned off during differentiation (Supplementary Material, Fig. S3B). We used AS del 1-0 as a calibrator sample for these assays, since this AS iPSC line differentiates robustly into neurons using conventional neural differentiation assays (17). The PWS del 1-1 iPSC line was used as a negative control for these assays, since it does not robustly differentiate into neurons. Differentiation propensity of the PWS SD iPSC lines into neurons was determined based on two criteria: (i) robust expression of neural lineage markers and (ii) silencing of the pluripotency genes. PWS SD 2-8 and PWS SD 2-9 iPSC lines were found to have the highest propensities to differentiate into neurons due to the robust expression of neural lineage markers and silencing of the pluripotency genes. Despite the robust expression of the neural lineage markers in the PWS SD 2-4 iPSC line, this line may have limited differentiation potential in conventional neural differentiation assays due to the inappropriate expression of the pluripotency genes in d16 EBs. PWS SD 2-8 and PWS 2-9 iPSC lines were chosen for further analysis.

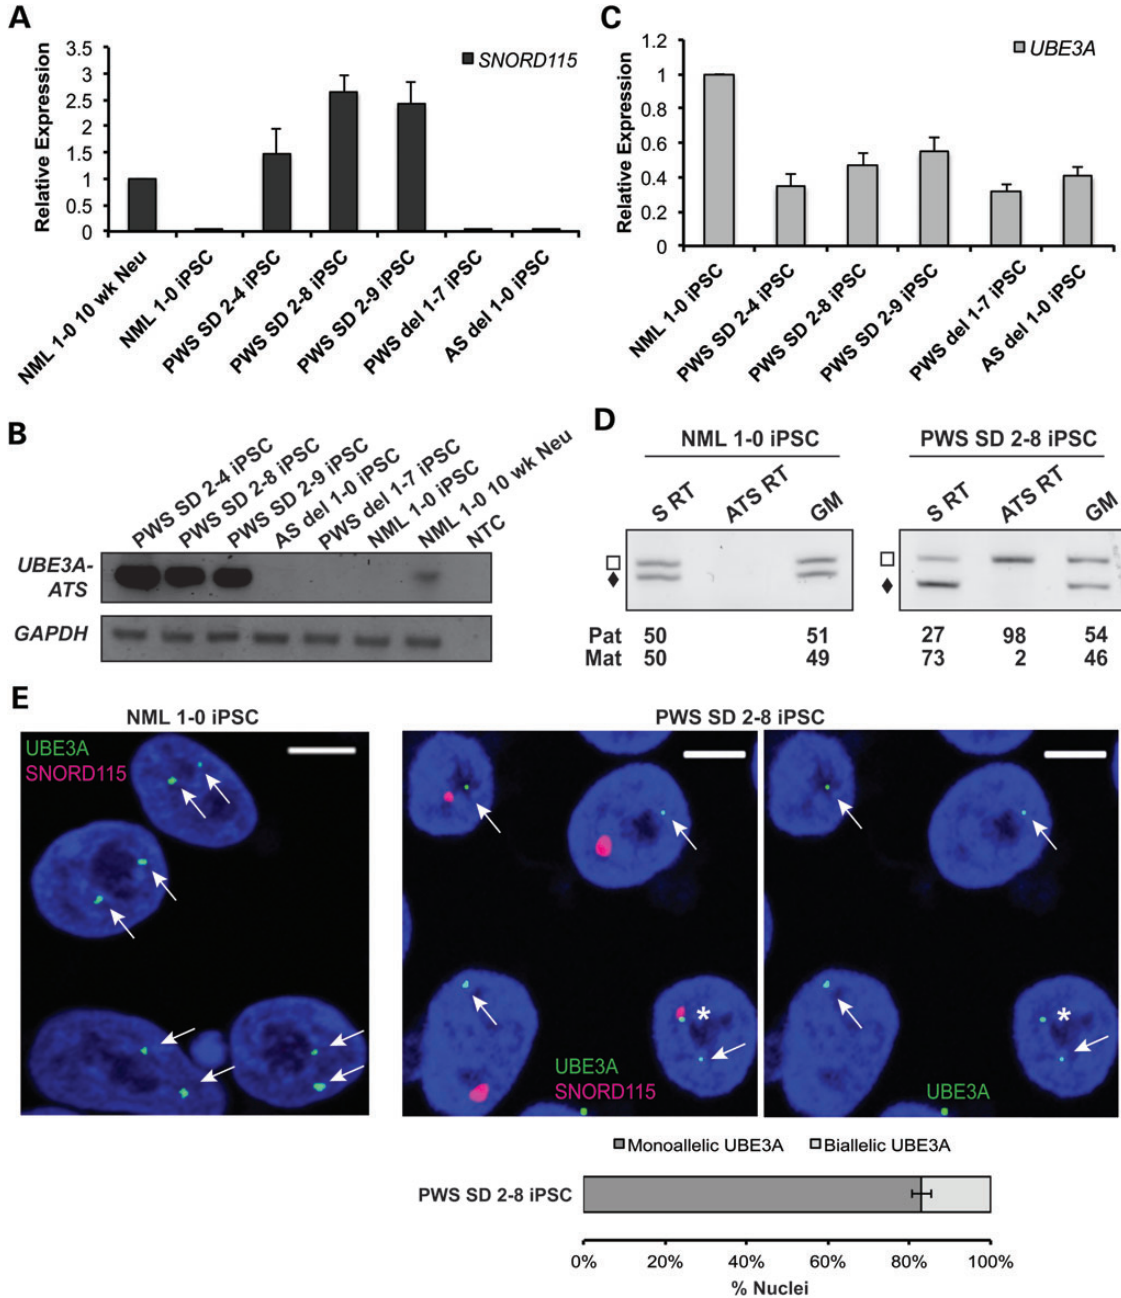

**Figure 3.** Imprinting of paternal *UBE3A* in non-neuronal cells. (A) Gene expression analysis of *SNORD115* snoRNAs in iPSCs by qRT-PCR. *GAPDH* was used as an endogenous control, and data were normalized to NML 1-0 10 week neurons. (B) Analysis of *UBE3A-ATS* expression in PWS SD iPSCs. RT-19 primers were used to analyze the expression of the *UBE3A-ATS* (13), and *GAPDH* was used as a control. NML 1-0 10 week neurons were used as a positive control, since the *UBE3A-ATS* is exclusively expressed in neurons. (C) Expression analysis of *UBE3A* in iPSCs. *GAPDH* was used as an endogenous control, and data were normalized to NML 1-0 iPSCs. PWS del 1-7 and AS del 1-0 iPSCs were used as controls. (D) Allele-specific RT-PCR showed equal expression of *UBE3A* in NML 1-0 iPSCs. In PWS SD iPSCs, the paternal *UBE3A* is repressed while *UBE3A-ATS* is expressed (S = sense, ATS = antisense and GM = genomic DNA). (E) RNA FISH using a riboprobe that specifically detects *UBE3A* sense transcripts (green) and a BAC probe that detects *SNORD115* transcripts (red). *UBE3A* is actively transcribed from both alleles, and *SNORD115* transcripts are not detected in NML 1-0 iPSCs. Scale bars = 5  $\mu$ m. In PWS SD iPSCs, 83% of *SNORD115*-positive nuclei showed monoallelic expression of *UBE3A* and 17% of that showed biallelic expression of *UBE3A*, as indicated by the asterisk.

Both PWS SD 2-8 and PWS SD 2-9 iPSC lines were differentiated into neurons, as previously described (17). Following 10 weeks of differentiation, MAP2-positive neurons were identified by immunocytochemistry. A representative image is shown for 10 week PWS SD 2-8 iPSC-derived neurons (Fig. 4B). The expression of the neuron-specific upstream

U1A, U2 and U4 exons was compared between PWS SD iPSCs and PWS SD iPSC-derived neurons by quantitative RT-PCR (Fig. 4C). The U1A and U2 exons were almost exclusively expressed in the neuron samples and were nearly undetectable in all six iPSC lines. Exon U4, which showed robust expression in NML 1-0, PWS SD 2-8 and PWS SD 2-9 iPSC-

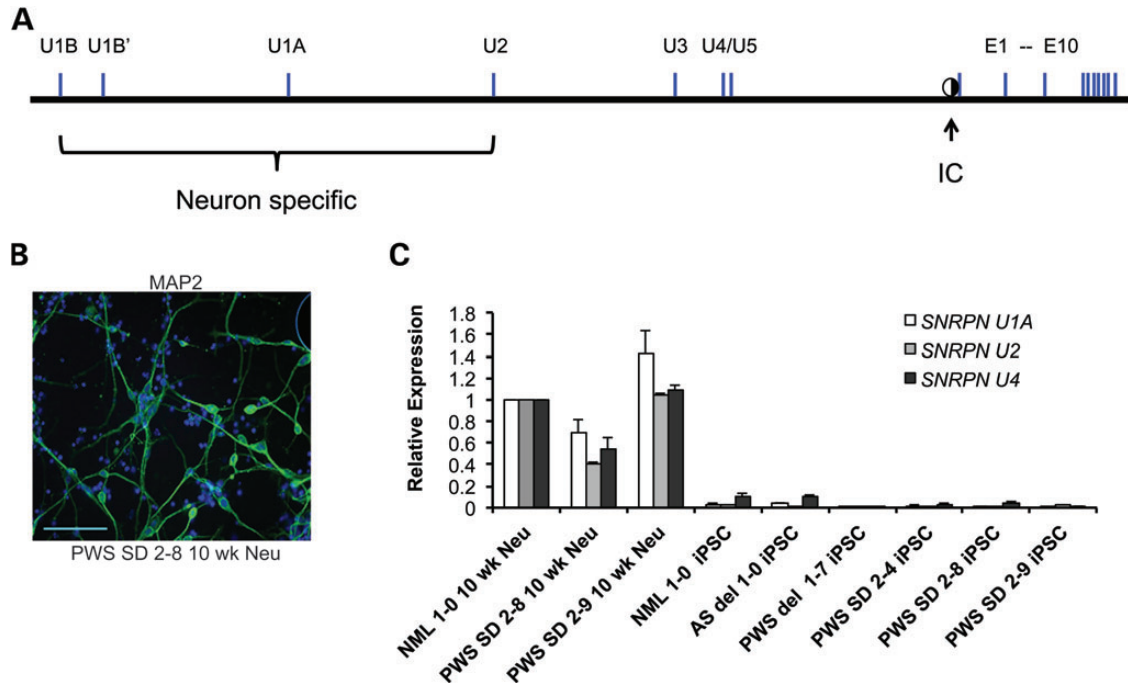

**Figure 4.** *SNRPN* upstream exon usage in PWS SD iPSCs neurons. (A) Map showing the organization of upstream *SNURF-SNRPN* exons (34). Upstream exons U1B, U1B', U1A and U2 are largely neuron specific, as indicated by the bracket. Exon U4 is expressed at low levels in a variety of tissues, including iPSCs. It is unclear whether U3 and U5 are brain specific. The location of the PWS-IC is indicated by a half-filled circle. (B) Immunocytochemistry for the neural marker MAP2 in PWS SD 2-8 10 week neurons. Cell nuclei were counterstained with DAPI. Scale bar = 100  $\mu$ m. (C) Expression analysis of upstream *SNRPN* exons. *GAPDH* was used as an endogenous control, and data were normalized to NML 1-0 10 week neurons, since these exons are predominately expressed in neurons.

derived neurons, was expressed at low levels in NML 1-0 and AS del 1-0 iPSCs, was barely detectable in PWS SD iPSCs, and was undetectable in PWS del 1-7 iPSCs. Thus, imprinted expression of *UBE3A* in PWS SD iPSCs was not caused by the aberrant expression of the neuron-specific upstream *SNRPN* exons. Moreover, these results suggest that expression of *UBE3A-ATS* is sufficient for imprinted expression of *UBE3A* and that additional neuron-specific events were not required for this imprinting in non-neural tissues.

#### The shortened *UBE3A-ATS* in PWS SD neurons is less amenable to silencing by topotecan

Topoisomerase inhibitors have been shown to repress *Ube3a-ats* in mouse (27). This effect is length dependent and is shared between mouse and human across the genome, with longer genes showing greater repression by topoisomerase inhibitors (28). Since the *UBE3A-ATS* transcript is reduced by 187 kb in PWS SD iPSCs, we sought to determine whether a topoisomerase inhibitor was less effective on the shortened *UBE3A-ATS* transcript. We treated 10-week-old AS and PWS SD iPSC-derived neurons with increasing doses of Topotecan, a camptothecin-type topoisomerase inhibitor that was previously shown to be effective at reducing mouse *Ube3a-ats*. We then performed qRT-PCR using a probe-primer set that recognizes the *SNURF-SNRPN* ncRNA in the region of *SNORD115*. This *SNORD115* host transcript can be used as a proxy for *UBE3A-ATS*, and thus avoids possible confusion with the sense *UBE3A* transcript. Topotecan was highly effective in reducing the *SNURF-SNRPN* ncRNA (which includes *UBE3A-ATS*)

in AS iPSC-derived neurons, showing 90% reduction of the transcript at a 10  $\mu$ M dose (Fig. 5). However, topotecan was less effective in repressing the shortened *SNURF-SNRPN* ncRNA in PWS SD neurons, only showing a maximum 46% reduction compared with the 90% reduction seen in AS neurons (Fig. 5).

## DISCUSSION

Here we show that iPSCs derived from patients with PWS due to a small deletion on paternal chromosome 15q11–q13 express *UBE3A-ATS* and have imprinted expression of *UBE3A*. *UBE3A-ATS* expression is typically restricted to neurons, and consequently so is *UBE3A* imprinting. Work over the past decade has steadily focused on *UBE3A-ATS* as the mediator of *UBE3A* imprinted expression (16,17,19,29). Thus, understanding the neuron-specific regulation of *UBE3A-ATS* is critical for understanding the regulation of *UBE3A* imprinted expression.

*UBE3A-ATS* is within the neuron-specific portion of the *SNURF-SNRPN* ncRNA, which also includes *SNORD115* and *SNORD109B* (13). In non-neuronal tissues and cell types, transcription of the *SNURF-SNRPN* locus usually stops at *IPW*, and thus *SNORD115*, *SNORD109B* and *UBE3A-ATS* are not expressed (17). In contrast to normal iPSCs where the neuron-specific portion of *SNURF-SNRPN* is not expressed, PWS SD iPSCs showed robust expression of *SNORD115* and *UBE3A-ATS* (Fig. 3A and B). In normal iPSCs, the polyadenylation sites that lie at the 3' end of *IPW* are likely transcriptional stops for the *SNURF-SNRPN* transcript. These sites, as well as additional as-of-yet unidentified regulatory elements, have been removed in the PWS SD patient-derived iPSCs, placing the

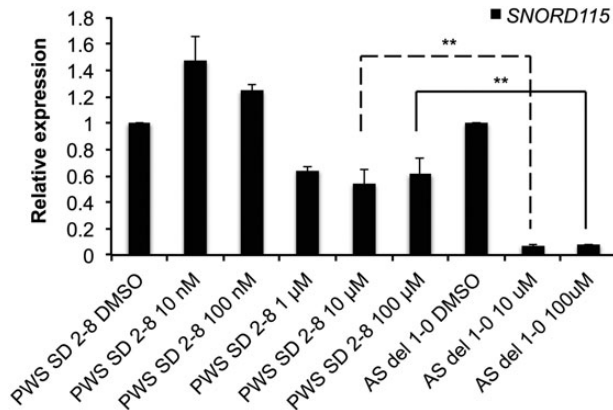

**Figure 5.** Topotecan is less effective in repressing the *UBE3A-ATS* in PWS SD neurons. Relative expression of *SNORD115* by qRT-PCR in 10 week neurons derived from PWS SD and AS iPSC lines treated with various concentrations of Topotecan. *GAPDH* was used as an endogenous control. \*\**P*-value  $\leq 0.05$ .

*SNURF-SNRPN* promoter and exon 1 in direct association with the *SNORD115* portion of the transcript. The identification of the regulatory elements that stop *SNURF-SNRPN* transcription will be an important clue in understanding the neuron-specific regulation of *UBE3A-ATS* and imprinted *UBE3A* expression. Alternatively, the *SNURF-SNRPN* transcript is terminated at *IPW* because that is the maximum length that can be transcribed during the iPSC cell cycle.

The aberrant expression of *UBE3A-ATS* transcript in PWS SD iPSCs leads to imprinted *UBE3A* expression (Fig. 3). We demonstrated this in three ways. First, we determined *UBE3A* expression levels. *UBE3A* mRNA levels in PWS SD iPSCs are consistent with having only a single expressed allele of the gene, like PWS and AS iPSCs harboring large deletions of paternal and maternal chromosome 15q11–q13, respectively. Normal iPSCs have *UBE3A* mRNA levels consistent with having two expressed copies of the gene (Fig. 3C). Secondly, we determined whether *UBE3A* is expressed from one or two alleles in PWS SD iPSCs using strand-specific RT-PCR. *UBE3A* is primarily expressed from a single allele in these cells and *UBE3A-ATS* is expressed exclusively from the opposite allele (Fig. 3D). Finally, we used RNA FISH to confirm that *UBE3A* was coming from a single allele that did not produce the *SNORD115* transcript (Fig. 3E). These data suggest that *UBE3A-ATS* expression is sufficient for the imprinted expression of *UBE3A*, and that additional neuron-specific factors are not necessary for the repression of paternal *UBE3A*.

Interestingly, imprinting of *UBE3A* is not complete in every cell, as evidenced by both the RT-PCR and RNA FISH data. In fact, the RNA FISH data demonstrated that  $\sim 20\%$  of the cells showed juxtaposed *UBE3A* and *SNORD115* expression in the same cell (Fig. 3E). While we do not know the exact reason for this, we speculate that in the dividing PWS SD iPSCs, replication may cause the premature termination of the *SNURF-SNRPN/SNORD115* transcript prior to overlapping *UBE3A*, thus allowing *UBE3A* transcription in the sense direction. Indeed, paternal *Ube3a* has been shown to retain active histone modifications, even in the brain (30). The PWS SD iPSCs described here show that imprinted *UBE3A* expression can be maintained by the *UBE3A-ATS*, even in the presence of

a transcriptionally competent paternal *UBE3A* promoter. It is therefore not necessary that paternal *UBE3A* undergoes repressive chromatin changes, even in neurons where it is normally imprinted.

There was a slight discrepancy between the FISH and RT-PCR data. The FISH data showed that  $17\% \pm 2\%$  of cells showed detectable expression from the paternal allele of *UBE3A* (Fig. 3E, lower panel), while the RT-PCR data showed that 27% of the total *UBE3A* RNA came from the paternal allele (Fig. 3D). There are at least three possible explanations for this: (i) the FISH assay failed to detect *UBE3A* in some cells where it was expressed from the paternal allele at a level lower than the detection limit; (ii) the active paternal allele is expressing more *UBE3A* than the maternal allele in some or all of the cells, so that  $\sim 17\%$  of the cells are producing  $\sim 27\%$  of the RNA or (iii) the semi-quantitative RT-PCR experiment may suffer from amplification bias or measurement bias (i.e. the genomic DNA in PWS SD 2-8 was measured as 54% paternal and 46% maternal).

Topoisomerase inhibitors were shown to reactivate the paternal allele of *Ube3a* in mouse neurons by repressing *Snurf-Snrpn/Ube3a-ats* (27). This occurs because topoisomerases are required for efficient transcription of long genes in both human and mouse neurons (28). The 187 kb deletion of the *SNORD116* cluster enabled us to examine the effect of a topoisomerase inhibitor, topotecan, on a shortened *SNURF-SNRPN/UBE3A-ATS* transcript. We found that topotecan was not as effective on the shortened *UBE3A-ATS* transcript as it was on the full-length transcript, further supporting the observation that topoisomerases are important for the transcription of *UBE3A-ATS* and other long genes (Fig. 5).

Altogether, these data demonstrate that the *SNURF-SNRPN* transcript is regulated by a boundary element in non-neurons, and that in its absence, the expression of *UBE3A-ATS* is sufficient to cause *UBE3A* imprinted expression in the absence of additional neural factors. We do not know what comprises this boundary element, but we speculate that either the polyadenylation sites in the *IPW* gene act as transcriptional terminators, that CTCF protein-binding sites downstream of *IPW* separate active versus inactive chromatin territories or a combination of those two possibilities work to perform the boundary function. These findings provide important clues as to the regulation of the *SNURF-SNRPN* ncRNA in humans. Furthermore, they demonstrate that iPSCs derived from rare individuals with atypical deletions can teach us important lessons about the mechanisms of gene regulation.

## MATERIALS AND METHODS

### Cell lines and culture conditions

AS del 1-0, PWS del 1-1, PWS del 1-7 and NML 1-0 iPSC lines used in this study were cultured as described (17). Moreover, PWS small deletion (PWS SD) iPSC lines were derived from patient fibroblasts (21) using the human polycistronic STEMCCA lentiviral vector encoding *OCT4*, *KLF4*, *SOX2*, *CMYC* and cultured following previously published protocols (24). The iPSC lines were cultured in the hESC medium, i.e. Dulbecco's modified Eagle's medium/F-12 containing 20% Knock-Out serum replacer, 0.1 mM non-essential amino acids, 1 mM

L-glutamine (all from Life Technologies, Grand Island, NY), 0.1 mM  $\beta$ -mercaptoethanol (Sigma-Aldrich, St. Louis, MO, USA), supplemented with 4 ng/ml bFGF (Millipore, Billerica, MA, USA).

### Immunocytochemistry

Immunocytochemistry was performed as previously described (31), using rabbit anti-NANOG (Stemgent, Cambridge, MA, USA), mouse anti-SSEA-4 (Developmental Studies Hybridoma Bank, Iowa City, IA, USA), mouse anti-TRA1-60 or mouse anti-TRA1-81 (Santa Cruz Biotechnology, Santa Cruz, CA, USA) or mouse anti-MAP2 (Millipore) antibodies. Cell nuclei were counterstained with DAPI.

### qRT-PCR

RNA was isolated from cells using RNA-Bee (Tel Test, Inc., Friendswood, TX, USA) and cDNA was synthesized using High Capacity cDNA Reverse Transcription Kit (Life Technologies). Gene expression was analyzed using TaqMan<sup>®</sup> Gene Expression Assays, and the *GAPDH* Endogenous Control TaqMan<sup>®</sup> Assay was used as an endogenous control. Experiments were performed in triplicate. The data were analyzed using RQ2.1 software (Applied Biosystems), normalized to either NML 1-0 iPSCs or NML 1-0 10 week neurons. The Sybr qRT-PCR primers used to examine the expression of *SNRPN* upstream U2 and U4 exons, relative to the *GAPDH* endogenous control, are listed in Supplementary Material, Table S2.

### Methylation-sensitive restriction endonuclease quantitative PCR assay

These assays were performed as described (17). The Methyl Profiler enzyme kit and *SNRPN* primer set (Qiagen) were used according to the manufacturer's instructions to assay methylation at the PWS-IC. Percent methylation was reported plus or minus the SD of three replicates. No intermediate methylation was observed in any of the fibroblast or iPSC lines with this assay. The *SNRPN* primer set assays seven different CpG sites within the PWS-IC.

### RT-PCR for *UBE3A-ATS*

To examine whether the *UBE3A-ATS* was expressed in the PWS SD iPSC lines, conventional PCR primers were used. RT-19 primers described in Runte *et al.* (13) were used to analyze the expression of the *UBE3A-ATS*, and *GAPDH* was used as a loading control. NML 1-0 10 week neurons were used as a positive control, since the *UBE3A-ATS* is exclusively expressed in neurons.

### Allele-specific RT-PCR

RNA was extracted from iPSCs using RNA-Bee (Tel Test, Inc.), followed by DNase treatment using TURBO DNA-free Kit (Life Technologies AM1907). DNase-treated RNA of 1  $\mu$ g of was reverse transcribed using Superscript III (Life Technologies) at 53°C with strand-specific primers with tag sequences (**GGAAA CAGCTATGACCATAACAATTTTCCCATT**CAGAT for

sense, and **CAGTCGGGGCGTCATCATTTTCGTTATTGTT CCTTAGAA** for anti-sense; tag sequences are shown in bold). PCR was performed with annealing temperature at 60°C for 27 cycles using Advantage 2 Polymerase Mix (Clontech, Mountain View, CA, USA) with primer sequences as the following: CAT-GAGCTTAGACTTCACCTTCA and GGGACCTCATGATG GCAATA. PCR products were run on precast Novex TBE 6% polyacrylamide gel (Life Technologies) and post-stained with SYBR Gold (Life Technologies). Images were taken using LAS-3000 and the bands were quantified using Multigauge V3.0 software (Fujifilm, Tokyo, Japan).

### RNA FISH

iPSCs were grown on MEF-covered 12 mm coverslips for 4–6 days. Prior to 4% paraformaldehyde/PBS fixation for 10 min, coverslips were treated with CSK buffer for 30 s, 1% Triton-X100/CSK buffer for 10 min, and CSK buffer for 30 s. Coverslips were then dehydrated with 70, 85, 95 and 100% EtOH for 2 min each and air dried before hybridizing with probes. *SNORD115* probes were made by labeling BAC RP11-37A4 using ENZO Nick Translation DNA Labeling System (Enzo, Farmingdale, NY, USA) with Alexa Fluor 594 dUTPs (Life Technologies) according to the manufacturer's instructions. *UBE3A* sense riboprobes were made from C7-3 cDNA (32) cloned in pBluescript SK+ and *in vitro* transcribed using the MAXIscript T7/T3 Kit (Life Technologies) with Alexa Fluor 488 UTPs (Life Technologies) according to the manufacturer's instructions. Transcribed riboprobes of 1  $\mu$ g were hydrolyzed in carbonate buffer (60 mM Na<sub>2</sub>CO<sub>3</sub> and 40 mM NaHCO<sub>3</sub>) at 60°C for 30 min and neutralized in 1/20 volume of 10% acetic acid prior to purifying labeled riboprobes by Micro Bio-Spin P-30 Tris column (Bio-Rad, Hercules, CA, USA). One hundred nanograms of labeled *SNORD115* was added to the *UBE3A* purified riboprobes along with 5  $\mu$ g of human Cot-1 DNA, 5  $\mu$ g of salmon sperm DNA and 2.5 volumes of 100% EtOH. Probes were precipitated at –20°C for 30 min and centrifuged at 12 000 rpm for 30 min. Probe pellets were air dried in the dark for 15 min and reconstituted in 100% formamide before heat denaturing at 85°C for 10 min. Two times hybridization buffer (4  $\times$  SSC, 20% dextran sulfate, 2 mg/ml BSA) was added to the probes and applied equally to coverslips for overnight hybridization at 37°C in a dark humid chamber containing 2  $\times$  SSC/50% formamide. Coverslips were washed three times with 2  $\times$  SSC/50% formamide, three times with 2  $\times$  SSC and three times with 1  $\times$  SSC for 7 min each at 39°C prior to mounting with DAPI (Vectashield, Burlingame, CA, USA). Images were taken using Zeiss 780 confocal microscope.

### Neural differentiation

Ten-week neurons were differentiated from iPSCs using the monolayer protocol as described (33). Briefly, one-day post-split iPSCs were growing in N2B27 medium supplemented with 500 ng/ml Noggin (R&D Systems, Minneapolis, MN, USA) for 10 days. These colonies were then spilt onto poly-L-lysine and laminin-coated plates using StemPro EZ Passage tool (Life Technologies) and kept in N2B27 medium for 7 days. Once rosettes were forming in these colonies, the cells were



trypsinized and replated onto poly-L-lysine and laminin-coated plates at higher density in N2B27 medium supplemented with ROCK inhibitor overnight. The cells were kept in N2B27 medium for another 6 days and split onto poly-L-lysine and laminin-coated plates with 1:4 to 1:6 ratio in neural differentiation media for 2 weeks. The cells were then split with 1:6 ratio for another 5 weeks in neural differentiation media before topoisomerase inhibitor treatment.

### Topoisomerase inhibitor treatment

Topoisomerase inhibitor, topotecan (Molcan Corporation, Toronto, Ontario, Canada), was dissolved in DMSO (Sigma-Aldrich) to make a 100 mM stock. A series of dilutions was made to achieve the final concentrations of 100, 10, 1  $\mu$ M, 100 and 10 nM containing 0.1% DMSO for dose–response curve experiments. The cells were treated with various concentrations of topoisomerase inhibitor for continuous 6 days prior to collecting RNA for experiments.

### SUPPLEMENTARY MATERIAL

Supplementary Material is available at *HMG* online.

### ACKNOWLEDGEMENTS

We would like to thank Dr. Susan Holder for collecting the skin biopsy from the patient, and members of the laboratory for their helpful discussions and critical reading of the manuscript. The contents in this work are solely the responsibility of the authors and do not necessarily represent the official views of the state of Connecticut.

*Conflict of Interest statement.* None declared.

### FUNDING

This work was supported by grants from the National Institutes of Health (R01HD068730 to S.J.C.); Foundation for Prader–Willi Syndrome (to M.L.); Connecticut Stem Cell Research Grant (11SCA01 to K.M.-T and 12SCBUHC to S.J.C.) and the Raymond and Beverly Sackler Foundation.

### REFERENCES

- Cassidy, S.B., Dykens, E. and Williams, C.A. (2000) Prader–Willi and Angelman syndromes: sister imprinted disorders. *Am. J. Med. Genet.*, **97**, 136–146.
- Williams, C.A., Beaudet, A.L., Clayton-Smith, J., Knoll, J.H., Kyllerman, M., Laan, L.A., Magenis, R.E., Moncla, A., Schinzel, A.A., Summers, J.A. *et al.* (2006) Angelman syndrome 2005: updated consensus for diagnostic criteria. *Am. J. Med. Genet. A*, **140**, 413–418.
- Miller, J.L., Lynn, C.H., Driscoll, D.C., Goldstone, A.P., Gold, J.A., Kimonis, V., Dykens, E., Butler, M.G., Shuster, J.J. and Driscoll, D.J. (2011) Nutritional phases in Prader–Willi syndrome. *Am. J. Med. Genet. Part A*, **155A**, 1040–1049.
- Cassidy, S.B. and Driscoll, D.J. (2009) Prader–Willi syndrome. *Eur. J. Hum. Genet.*, **17**, 3–13.
- Reis, A., Dittrich, B., Greger, V., Buiting, K., Lalande, M., Gillissen-Kaesbach, G., Anvret, M. and Horsthemke, B. (1994) Imprinting mutations suggested by abnormal DNA methylation patterns in familial Angelman and Prader–Willi syndromes. *Am. J. Hum. Genet.*, **54**, 741–747.
- Saitoh, S., Buiting, K., Rogan, P.K., Buxton, J.L., Driscoll, D.J., Arneemann, J., Konig, R., Malcolm, S., Horsthemke, B. and Nicholls, R.D. (1996) Minimal definition of the imprinting center and fixation of chromosome 15q11–q13 epigenotype by imprinting mutations. *Proc. Natl. Acad. Sci. USA*, **93**, 7811–7815.
- Jong, M.T., Carey, A.H., Caldwell, K.A., Lau, M.H., Handel, M.A., Driscoll, D.J., Stewart, C.L., Rinchik, E.M. and Nicholls, R.D. (1999) Imprinting of a RING zinc-finger encoding gene in the mouse chromosome region homologous to the Prader–Willi syndrome genetic region. *Hum. Mol. Genet.*, **8**, 795–803.
- Boccaccio, I., Glatt-Deeley, H., Watrin, F., Roeckel, N., Lalande, M. and Muscatelli, F. (1999) The human MAGEL2 gene and its mouse homologue are paternally expressed and mapped to the Prader–Willi region. *Hum. Mol. Genet.*, **8**, 2497–2505.
- Jay, P., Rougeulle, C., Massacrier, A., Moncla, A., Mattei, M.G., Malzac, P., Roeckel, N., Taviaux, S., Lefranc, J.L., Cau, P. *et al.* (1997) The human necdin gene, NDN, is maternally imprinted and located in the Prader–Willi syndrome chromosomal region. *Nat. Genet.*, **17**, 357–361.
- Buiting, K., Nazlican, H., Galetka, D., Wawrzik, M., Gross, S. and Horsthemke, B. (2007) C15orf2 and a novel noncoding transcript from the Prader–Willi/Angelman syndrome region show monoallelic expression in fetal brain. *Genomics*, **89**, 588–595.
- Cattanach, B.M., Barr, J.A., Evans, E.P., Burtenshaw, M., Beechey, C.V., Leff, S.E., Brannan, C.I., Copeland, N.G., Jenkins, N.A. and Jones, J. (1992) A candidate mouse model for Prader–Willi syndrome which shows an absence of Snrpn expression. *Nat. Genet.*, **2**, 270–274.
- Glenn, C.C., Porter, K.A., Jong, M.T., Nicholls, R.D. and Driscoll, D.J. (1993) Functional imprinting and epigenetic modification of the human SNRPN gene. *Hum. Mol. Genet.*, **2**, 2001–2005.
- Runte, M., Huttenhofer, A., Gross, S., Kieffmann, M., Horsthemke, B. and Buiting, K. (2001) The IC-SNURF-SNRPN transcript serves as a host for multiple small nucleolar RNA species and as an antisense RNA for UBE3A. *Hum. Mol. Genet.*, **10**, 2687–2700.
- Cavaille, J., Buiting, K., Kieffmann, M., Lalande, M., Brannan, C.I., Horsthemke, B., Bachellerie, J.P., Brosius, J. and Huttenhofer, A. (2000) Identification of brain-specific and imprinted small nucleolar RNA genes exhibiting an unusual genomic organization. *Proc. Natl. Acad. Sci. USA*, **97**, 14311–14316.
- Wevrick, R., Kerns, J.A. and Francke, U. (1994) Identification of a Novel Paternally Expressed Gene in the Prader–Willi-Syndrome Region. *Hum. Mol. Genet.*, **3**, 1877–1882.
- Rougeulle, C., Cardoso, C., Fontes, M., Colleaux, L. and Lalande, M. (1998) An imprinted antisense RNA overlaps UBE3A and a second maternally expressed transcript. *Nat. Genet.*, **19**, 15–16.
- Chamberlain, S.J., Chen, P.F., Ng, K.Y., Bourgois-Rocha, F., Lemtiri-Chlieh, F., Levine, E.S. and Lalande, M. (2010) Induced pluripotent stem cell models of the genomic imprinting disorders Angelman and Prader–Willi syndromes. *Proc. Natl. Acad. Sci. USA*, **107**, 17668–17673.
- Rougeulle, C., Glatt, H. and Lalande, M. (1997) The Angelman syndrome candidate gene, UBE3A/E6-AP, is imprinted in brain. *Nat. Genet.*, **17**, 14–15.
- Meng, L., Person, R.E. and Beaudet, A.L. (2012) Ube3a-ATS is an atypical RNA polymerase II transcript that represses the paternal expression of Ube3a. *Hum. Mol. Genet.*, **21**, 3001–3012.
- Kishino, T., Lalande, M. and Wagstaff, J. (1997) UBE3A/E6-AP mutations cause Angelman syndrome. *Nat. Genet.*, **15**, 70–73.
- de Smith, A.J., Purmann, C., Walters, R.G., Ellis, R.J., Holder, S.E., Van Haelst, M.M., Brady, A.F., Fairbrother, U.L., Dattani, M., Keogh, J.M. *et al.* (2009) A deletion of the HBII-85 class of small nucleolar RNAs (snRNAs) is associated with hyperphagia, obesity and hypogonadism. *Hum. Mol. Genet.*, **18**, 3257–3265.
- Sahoo, T., del Gaudio, D., German, J.R., Shinawi, M., Peters, S.U., Person, R.E., Garnica, A., Cheung, S.W. and Beaudet, A.L. (2008) Prader–Willi phenotype caused by paternal deficiency for the HBII-85 C/D box small nucleolar RNA cluster. *Nat. Genet.*, **40**, 719–721.
- Duker, A.L., Ballif, B.C., Bawle, E.V., Person, R.E., Mahadevan, S., Alliman, S., Thompson, R., Traylor, R., Bejjani, B.A., Shaffer, L.G. *et al.* (2010) Paternally inherited microdeletion at 15q11.2 confirms a significant role for the SNORD116 C/D box snoRNA cluster in Prader–Willi syndrome. *Eur. J. Hum. Genet.*, **18**, 1196–1201.
- Somers, A., Jean, J.C., Sommer, C.A., Omari, A., Ford, C.C., Mills, J.A., Ying, L., Sommer, A.G., Jean, J.M., Smith, B.W. *et al.* (2010) Generation of transgene-free lung disease-specific human induced pluripotent stem cells using a single excisable lentiviral stem cell cassette. *Stem Cells*, **28**, 1728–1740.

25. Bock, C., Kiskinis, E., Verstappen, G., Gu, H., Boulting, G., Smith, Z.D., Ziller, M., Croft, G.F., Amoroso, M.W., Oakley, D.H. *et al.* (2011) Reference Maps of human ES and iPS cell variation enable high-throughput characterization of pluripotent cell lines. *Cell*, **144**, 439–452.
26. Landers, M., Bancescu, D.L., Le Meur, E., Rougeulle, C., Glatt-Deeley, H., Brannan, C., Muscatelli, F. and Lalande, M. (2004) Regulation of the large (approximately 1000 kb) imprinted murine Ube3a antisense transcript by alternative exons upstream of Snurf/Snrpn. *Nuc. Acids Res.*, **32**, 3480–3492.
27. Huang, H.S., Allen, J.A., Mabb, A.M., King, I.F., Miriyala, J., Taylor-Blake, B., Sciaky, N., Dutton, J.W. Jr, Lee, H.M., Chen, X. *et al.* (2012) Topoisomerase inhibitors unsilence the dormant allele of Ube3a in neurons. *Nature*, **481**, 185–189.
28. King, I.F., Yandava, C.N., Mabb, A.M., Hsiao, J.S., Huang, H.S., Pearson, B.L., Calabrese, J.M., Stamer, J., Parker, J.S., Magnuson, T. *et al.* (2013) Topoisomerases facilitate transcription of long genes linked to autism. *Nature*, **501**, 58–62.
29. Chamberlain, S.J. and Brannan, C.I. (2001) The Prader–Willi syndrome imprinting center activates the paternally expressed murine Ube3a antisense transcript but represses paternal Ube3a. *Genomics*, **73**, 316–322.
30. Rougeulle, C., Navarro, P. and Avner, P. (2003) Promoter-restricted H3 Lys 4 di-methylation is an epigenetic mark for monoallelic expression. *Hum. Mol. Genet.*, **12**, 3343–3348.
31. Zeng, H., Guo, M., Martins-Taylor, K., Wang, X., Zhang, Z., Park, J.W., Zhan, S., Kronenberg, M.S., Lichtler, A., Liu, H.X. *et al.* (2010) Specification of region-specific neurons including forebrain glutamatergic neurons from human induced pluripotent stem cells. *PLoS One*, **5**, e11853.
32. Kishino, T. and Wagstaff, J. (1998) Genomic organization of the UBE3A/E6-AP gene and related pseudogenes. *Genomics*, **47**, 101–107.
33. Germain, N.D., Banda, E.C., Becker, S., Naegele, J.R. and Grabel, L.B. (2013) Derivation and Isolation of NKX2.1-Positive Basal Forebrain Progenitors from Human Embryonic Stem Cells. *Stem Cells Dev.*, **22**, 1477–1489.
34. Farber, C., Dittrich, B., Buiting, K. and Horsthemke, B. (1999) The chromosome 15 imprinting centre (IC) region has undergone multiple duplication events and contains an upstream exon of SNRPN that is deleted in all Angelman syndrome patients with an IC microdeletion. *Hum. Mol. Genet.*, **8**, 337–343.
